# Supplementary material for: In situ simultaneous investigation of the transport of phenanthrene and fluoranthene adsorbed onto the root surfaces to tissues of mangrove seedlings
Source: Royal Society of Chemistry journal article supplement (doi:10.1039/c5ay01501d), 2015-01-01
Supplement: c5ay01501d1.pdf [file c5ay01501d1.pdf]

Table S1. The derivative fluorescence Intensity (a.u.) of 300 ng/spot Phen at different distance between optical and root surface.

| Mangrove plant | Distance (mm) |         |         |         |         |         |
|----------------|---------------|---------|---------|---------|---------|---------|
|                | 1             | 2       | 3       | 4       | 5       | 6       |
| <i>Ko</i>      | 21824.4       | 24958.5 | 26531.4 | 29280.2 | 27325.5 | 10138.8 |
| <i>Bg</i>      | 22145.8       | 26337.4 | 28551.9 | 28034.7 | 26338.9 | 8937.4  |
| <i>Ac</i>      | 39133.2       | 42568.1 | 45431.8 | 44883.6 | 41198.5 | 13587.9 |

Table S2. Physicochemical properties of selected PAHs.

| PAHs | MW (g/mol) <sup>a</sup> | Log $K_{ow}$ <sup>b</sup> | $S_w$ (mg/L) <sup>c</sup> | Vapor Pressure (Pa)  |
|------|-------------------------|---------------------------|---------------------------|----------------------|
| Phen | 178.2                   | 4.46                      | 1.18                      | $6.8 \times 10^{-4}$ |
| Fla  | 202.3                   | 5.20                      | 0.26                      | $10^{-6} - 10^{-4}$  |

<sup>a</sup> 'MW' represents molecular weight of PAHs; <sup>b</sup> ' $K_{ow}$ ' represents the octanol-water partition coefficients; <sup>c</sup> ' $S_w$ ' represents solubility of PAHs in water.

Table captions

Table S1. The derivative fluorescence Intensity (a.u.) of 300 ng/spot Phen at different distance between optical and root surface.

Table S2. Physicochemical properties of selected PAHs.
